# Supplementary material for: Evidenzbasierte Empfehlungen zur Überarbeitung der österreichischen Vorsorgeuntersuchung
Source: Springer Nature journal article supplement (doi:10.1007/s10354-019-0699-6), 2019-06-11
Supplement: MOESM1 [file 16799678]

Online Supplement 1: Mitglieder des Empfehlungsgremiums

| **Name** | **Profession** |
| --- | --- |
| Drin Magdalena Arrouas | Sektionschefin Bundesministerium für Arbeit, Soziales, Gesundheit und Konsumentenschutz |
| Dr. Gerald Bachinger | Patientenvertreter |
| Dr. Herbert Bachler | Arzt für Allgemeinmedizin |
| Dr. Günther Diem, MPH | Arzt für Allgemeinmedizin/Public Health |
| Assoc.-Prof. Priv-Doz. Dr. Thomas Dorner, MPH | Mediziner/Public Health |
| Dr. Bernd Haditsch | Facharzt für Innere Medizin |
| Drin Brigitte Piso MPH | Medizinerin /Public Health |
| Drin Irmgard Schiller-Frühwirth, MPH | Fachärztin für Pneumologie/Public Health |
| Prof. Drin Andrea Siebenhofer-Kroitzsch | Fachärztin für Innere Medizin |
| Prof. Dr. Uwe Siebert, MPH, MSc | Mediziner/Public Health |
| Prof. Dr. Thomas Pieber | Facharzt für Innere Medizin |
