# Supplementary material for: Evidenzbasierte Empfehlungen zur Überarbeitung der österreichischen Vorsorgeuntersuchung
Source: Springer Nature journal article supplement (doi:10.1007/s10354-019-0699-6), 2019-06-11
Supplement: MOESM2 [file 16796538]

## Screening und Beratung zu gesundheitsgefährdendem Alkoholkonsum

### Gesundheitsgefährdender Alkoholkonsum

**Verantwortliche Autorin:**  
Isolde Sommer

**Population:**  
Erwachsene ab 18 Jahre

**Intervention:** Screening und Beratung zu Alkoholkonsum

**Vergleich:** kein Screening

**Hauptpunkte:**  
siehe Tabelle 1

**Setting:** Österreich,  
Vorsorgeuntersuchung

**Perspektive:** Public Health

### Hintergrund

In Österreich konsumieren laut eigenen Angaben 54 % (56 % der Frauen und 51 % der Männer) Alkohol in moderatem Ausmaß (maximal 24 Gramm Reinalkohol pro Tag für Männer bzw. maximal 16 Gramm Reinalkohol für Frauen). 14 % (9 % der Frauen und 19 % der Männer) weisen ein gesundheitsgefährdendes Trinkverhalten auf. Als gesundheitsgefährdender oder problematischer Alkoholkonsum wird der tägliche Konsum von mehr als 40 g Reinalkohol von Frauen und 60 g von Männern bezeichnet. Ein halber Liter Bier und ein Viertelliter Wein enthalten jeweils 20 g Reinalkohol (1). Gesundheitsgefährdender Alkoholkonsum ist ein Risikofaktor für zahlreiche Gesundheitsprobleme wie kardiovaskuläre Erkrankungen, Krebserkrankungen, Lebererkrankungen und psychische Störungen. Auch Verletzungen und Unfälle können in Zusammenhang mit Alkohol stehen (2).

Die österreichische Vorsorgeuntersuchung (VU) empfiehlt derzeit ein Screening auf gesundheitsgefährdenden Alkoholkonsum mittels AUDIT-Fragebogen (Alcohol Use Disorders Identification Test) bei Erwachsenen ab 18 Jahre. Je nach Risikoprofil wird ein einfaches oder ausführliches Beratungsgespräch mit Wiederholungstermin geführt bzw. eine Überweisung zu einer spezialisierten Behandlung für Alkoholkrankheiten veranlasst. Der Gamma-GT-Wert kann zur Erleichterung der Diagnose bei manchen Patient/inn/en bestimmt werden (nicht näher definiert). Als Screening-Intervall werden 3 Jahre für Erwachsene im Alter von 18–40 Jahre und 2 Jahre für über 40-Jährige (3) empfohlen.

Das analytische Rahmenwerk zu Screening und Beratung nach gesundheitsgefährdendem Alkoholkonsum ist in Abbildung 1 dargestellt.

Abbildung 1: Analytisches Rahmenwerk

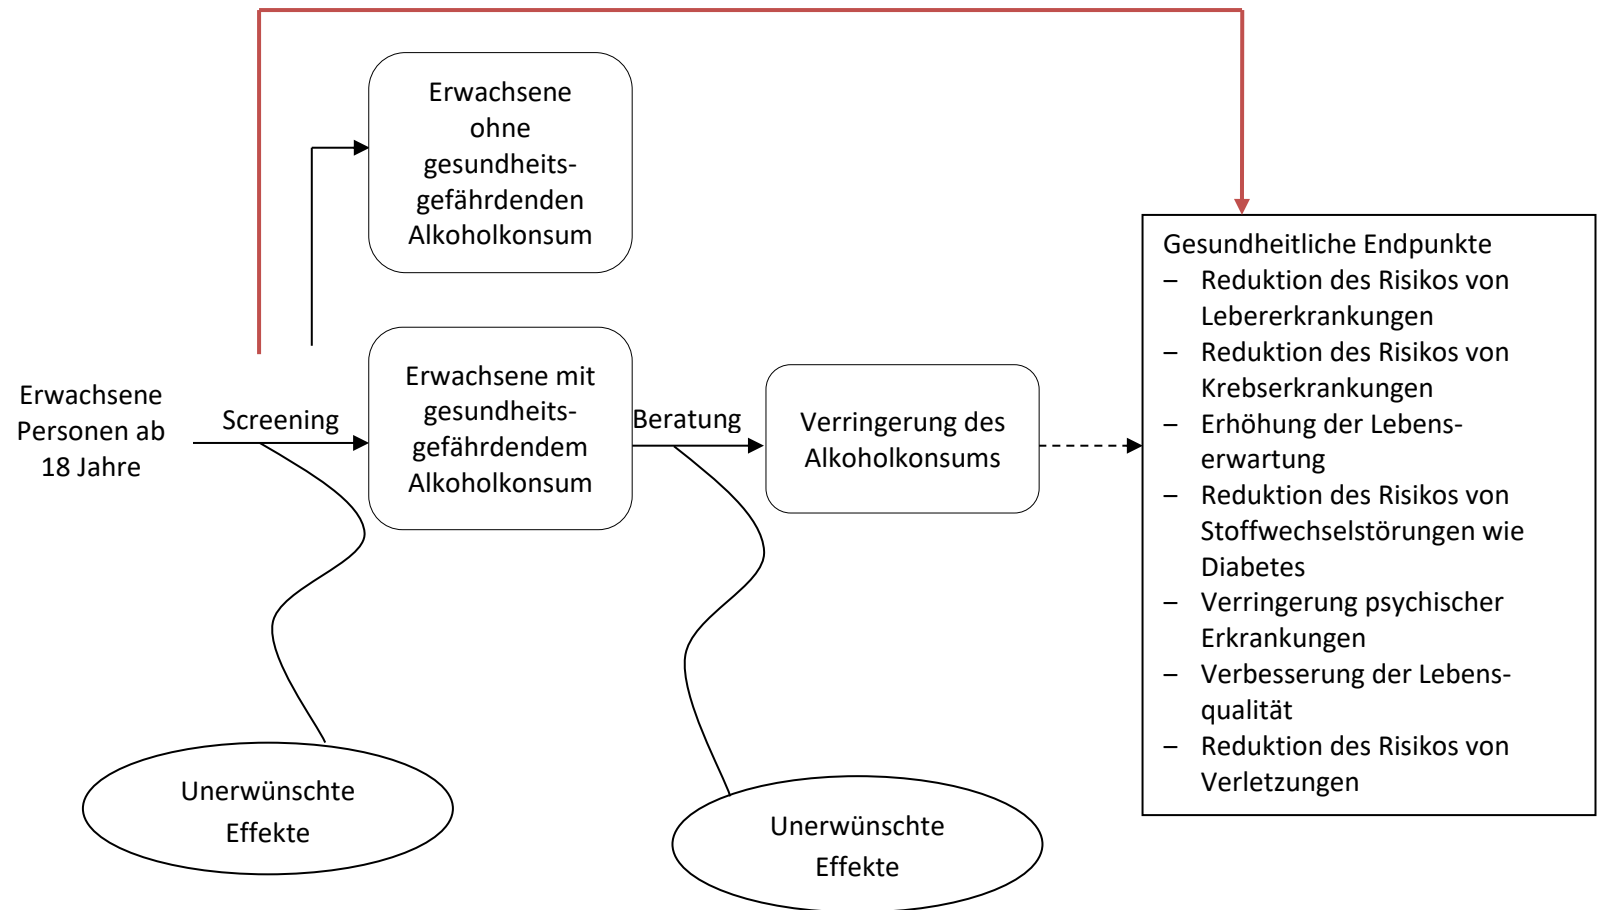

## ENDPUNKTE

Mittels modifiziertem Delphi-Verfahren wurde die Wichtigkeit der Endpunkte von 21 Bürger/inne/n und Expert/inn/en eingeschätzt. Dabei konnten Punkte von 1 (geringste Bedeutung) bis 9 (höchste Bedeutung) vergeben werden. Die acht höchstgereihten Endpunkte (fett markiert) werden in weiterer Folge für die Entscheidungsfindung berücksichtigt.

**Tabelle 1: Reihung der Endpunkte durch Bürger/innen und Expert/inn/en**

| Endpunkte (Vor- und Nachteile)                                                         | Mittelwert  | Bereich    |
|----------------------------------------------------------------------------------------|-------------|------------|
| <b>Als kritisch gereiht</b>                                                            |             |            |
| <b>Reduktion des Risikos von Lebererkrankungen</b>                                     | <b>7,10</b> | <b>4–9</b> |
| <b>Als wichtig gereiht</b>                                                             |             |            |
| <b>Reduktion des Risikos von Krebserkrankungen</b>                                     | <b>6,85</b> | <b>3–9</b> |
| <b>Verringerung des Alkoholkonsums</b>                                                 | <b>6,70</b> | <b>4–9</b> |
| <b>Erhöhung der Lebenserwartung</b>                                                    | <b>6,65</b> | <b>3–9</b> |
| <b>Reduktion des Risikos von Stoffwechselstörungen wie Diabetes mellitus</b>           | <b>6,65</b> | <b>4–9</b> |
| <b>Verringerung psychischer Erkrankungen</b>                                           | <b>6,55</b> | <b>3–9</b> |
| <b>Verbesserung des Wohlbefindens und der Zufriedenheit im Alltag (Lebensqualität)</b> | <b>6,25</b> | <b>3–9</b> |
| <b>Reduktion des Risikos von Verletzungen durch alkoholbedingte Unfälle</b>            | <b>6,15</b> | <b>2–9</b> |
| <b>Als wenig bedeutend gereiht</b>                                                     |             |            |
| Verunsicherung durch Untersuchung                                                      | 3,65        | 1–9        |
| Risiko für eine falsche Diagnose                                                       | 3,35        | 1–9        |
| Risiko, behandelt zu werden, obwohl man gesund ist                                     | 3,20        | 1–9        |

## DIREKTE EVIDENZ

Zur übergeordneten Frage "Wie wirkt sich Screening und Beratung zu Alkoholkonsum auf gesundheitsrelevante Endpunkte aus?" (rot im analytischen Rahmenwerk), konnte keine direkte Evidenz gefunden werden. Ein rezenter, systematischer Review der USPSTF (4) (Draft-Version) untersuchte zwar die Evidenz zu Nutzen und Schaden von Screening auf gesundheitsgefährdenden Alkoholkonsum bei Erwachsenen ab 18 Jahren sowie bei älteren Erwachsenen ab 65 Jahren, konnte dazu aber keine einzige Studie finden.

## VERKNÜPFTE EVIDENZ – Güte der Screeningtests

Derzeit wird im Rahmen der VU der AUDIT-Fragebogen als Screening-Instrument zur Identifikation von gesundheitsgefährdendem Alkoholkonsum verwendet. Zusätzlich kann ein Gamma-GT-Test durchgeführt werden.

### Testgüte von Fragebögen

Der USPSTF-Report (4) untersuchte die diagnostische Genauigkeit von 3 Tests: Kurzfragebögen (1–2 Items), AUDIT-C und gesamter AUDIT-Fragebogen. 1- bis 2-Item-Fragebögen bestehen aus Fragen wie "Wie oft im letzten Jahr hatten Sie 5 [für Männer] / 4 [für Frauen] oder mehr alkoholische Getränke an einem Tag?" Der AUDIT-C besteht aus 3 Items, die die Häufigkeit des Alkoholkonsums, die übliche Menge und die Anlässe für starken Alkoholkonsum abdecken. Das gesamte AUDIT enthält diese drei Punkte sowie sieben Fragen zu Anzeichen von Alkoholabhängigkeit und häufigen Problemen in Zusammenhang mit dem Alkoholkonsum (z. B. frühmorgens als Erstes ein alkoholisches Getränk benötigen). Der Review zeigte, dass alle drei Screeningtests bei Erwachsenen ab 18 Jahren eine ausreichende diagnostische Güte im Vergleich zu einem strukturierten oder semi-strukturierten diagnostischen Interview (4) haben.

### Kurzfragebögen (1–2 Items)

Der USPSTF-Review identifiziert sieben Studien, die die diagnostische Güte zur Bestimmung von ungesundem Alkoholkonsum von Fragebögen mit 1–2 Items mit einem strukturierten diagnostischen Interview vergleichen (5-11). In diesen Studien reicht bei optimalen Grenzwerten die Sensitivität von 0,65 bis 0,90 (Spanne 95 % CI 0,58–0,91) und die Spezifität von 0,68 bis 1,0 (Spanne 95 % CI 0,64–1,0) (n = 48.211). Beispielsweise ergeben sich aus der größten vollständig berichteten Studie (n = 1.851) (5) mit einer Sensitivität von 68 % (95 % CI 0,64–0,72) und einer Spezifität von 87 % (95 % CI 0,88–0,89), ausgehend von einer Prävalenz von 14 %, folgende korrekt/falsch positive/negative Testergebnisse pro 1.000 gescreente Personen:

| People with POSITIVE test result |                 | People with NEGATIVE test result |                 |
|----------------------------------|-----------------|----------------------------------|-----------------|
| True positives                   | False positives | True negatives                   | False negatives |
| 95<br>per 1000                   | 112<br>per 1000 | 748<br>per 1000                  | 45<br>per 1000  |

### Wie genau sind Fragebögen?

- Sehr ungenau
- Ungenau
- Genau
- Sehr genau
- Variiert
- Unklar

### AUDIT-C

Der USPSTF-Review identifizierte acht Studien, die die diagnostische Güte zur Bestimmung von ungesundem Alkoholkonsum des AUDIT-C Fragebogens mit einem strukturierten diagnostischen Interview vergleichen (5, 7, 8, 10-14). In diesen Studien reichte bei optimalen Grenzwerten die Sensitivität von 0,74–0,92 (Spanne 95 % CI 0,62–0,98) und die Spezifität von 0,66 bis 0,89 (Spanne 95 % CI 0,59–0,92) (n = 9.266). Beispielsweise ergeben sich aus der größten Studie (n = 3.551) (13) mit einer Sensitivität von 74 % (95 % CI 0,69–0,79) und einer Spezifität von 85 % (0,84–0,86), ausgehend von einer Prävalenz von 14 %, folgende korrekt/falsch positive/negative Testergebnisse pro 1.000 gescreente Personen:

| People with POSITIVE test result |                 | People with NEGATIVE test result |                 |
|----------------------------------|-----------------|----------------------------------|-----------------|
| True positives                   | False positives | True negatives                   | False negatives |
| 104<br>per 1000                  | 129<br>per 1000 | 731<br>per 1000                  | 36<br>per 1000  |

### AUDIT

Der USPSTF-Review identifiziert neun Studien, die die diagnostische Güte zur Bestimmung von ungesundem Alkoholkonsum des AUDIT-Fragebogens mit einem strukturierten diagnostischen Interview vergleichen (5, 7, 8, 10, 12-16). In diesen Studien reichte bei optimalen Grenzwerten die Sensitivität von 0,71 bis 0,91 (Spanne 95 % CI 0,43–0,96) und die Spezifität von 0,75 bis 0,96 (Spanne 95 % CI 0,63–0,98) (n = 9832). Beispielsweise ergeben sich aus der größten Studie (n = 3.551) (13) mit einer Sensitivität von 78 % (95 % CI 0,73–0,82) und einer Spezifität von 81 % (95 % CI 0,80–0,82), ausgehend von einer Prävalenz von 14 %, folgende korrekt/falsch positive/negative Testergebnisse pro 1.000 gescreente Personen:

| People with POSITIVE test result |                 | People with NEGATIVE test result |                 |
|----------------------------------|-----------------|----------------------------------|-----------------|
| True positives                   | False positives | True negatives                   | False negatives |
| 109<br>per 1000                  | 163<br>per 1000 | 697<br>per 1000                  | 31<br>per 1000  |

**Wie genau sind Biomarker?**

- Sehr ungenau
- Ungenau
- Genau
- Sehr genau
- Variiert
- Unklar

**Testgüte von Gamma-GT (Gamma-Glutamyltransferase) und CDT (Carbohydrate Deficient Transferrin)**

Ein systematischer Review des UKSCN (United Kingdom National Screening Committee) konnte keine Studien identifizieren, die die Testgüte von Gamma-GT oder CDT in einem Screening-Kontext oder an der Allgemeinbevölkerung untersuchen (17). Als Beispiel für die Testgüte von Gamma-GT und CDT sind hier die Ergebnisse der Studie Addiction Health Evaluation And Disease Management (AHEAD) (18) angeführt.

Diese analysierte die Testgüte von Gamma-GT und CDT zur Diagnose von Alkoholabhängigkeit im Vergleich zur Timeline-Follow-back, einer validierten, strukturieren Kalendermethode, die retrospektiv den Alkoholkonsum erfasst und quantifiziert (n = 361).

Für Gamma-GT zeigten die Ergebnisse eine Sensitivität von 20 % (95 % CI 14,6–26,3) und eine Spezifität von 86 % (95 % CI 79,9–91,0) für starken Alkoholkonsum. Ausgehend von einer Prävalenz von 14 % ergeben sich folgende korrekt/falsch positive/negative Testergebnisse pro 1.000 gescreente Personen:

| People with POSITIVE test result |                 | People with NEGATIVE test result |                 |
|----------------------------------|-----------------|----------------------------------|-----------------|
| True positives                   | False positives | True negatives                   | False negatives |
| 28<br>per 1000                   | 120<br>per 1000 | 740<br>per 1000                  | 112<br>per 1000 |

Für CDT zeigten die Ergebnisse eine Sensitivität von 41 % (95 % CI 33,7–48,0) und eine Spezifität von 96 % (95 % CI 91,3–98,3) für starken Alkoholkonsum. Ausgehend von einer Prävalenz von 14 % ergeben sich folgende korrekt/falsch positive/negative Testergebnisse pro 1.000 gescreente Personen:

| People with POSITIVE test result |                 | People with NEGATIVE test result |                 |
|----------------------------------|-----------------|----------------------------------|-----------------|
| True positives                   | False positives | True negatives                   | False negatives |
| 57<br>per 1000                   | 37<br>per 1000  | 823<br>per 1000                  | 83<br>per 1000  |

**Screening-Intervalle**

Keine verfügbare Evidenz.

## VERKNÜPFTE EVIDENZ - Wirksamkeit der Behandlung

Der USPSTF-Review (Draft-Version) untersuchte auch die Evidenz zu Nutzen und Schaden von kurzen, wiederholten Beratungen bei gesundheitsgefährdendem Alkoholkonsum von Erwachsenen ab 18 Jahren und bei älteren Erwachsenen ab 65 Jahren (4). Nachfolgend ist die Evidenz in Bezug auf die ausgewählten Endpunkte aufgelistet (Tabelle 2).

**Tabelle 2: Beratungen zu gesundheitsgefährdendem Alkoholkonsum, basierend auf USPSTF-Review aus 2018 (4) (Draft-Version) (5, 19)**

| Endpunkte                                          | Ergebnisse                                                                                                                                                                                                                                                                                                                                                                                                                                                                                                                                                                                                                                                                                                                                                                                                                                                                                                                                                                                                                                                                                                                                                                                                                                                                                                                                                                                                                                                                                                                                                                                                                   | Anzahl der Studien | Qualität der Evidenz (GRADE)                                                                                                                                                          |
|----------------------------------------------------|------------------------------------------------------------------------------------------------------------------------------------------------------------------------------------------------------------------------------------------------------------------------------------------------------------------------------------------------------------------------------------------------------------------------------------------------------------------------------------------------------------------------------------------------------------------------------------------------------------------------------------------------------------------------------------------------------------------------------------------------------------------------------------------------------------------------------------------------------------------------------------------------------------------------------------------------------------------------------------------------------------------------------------------------------------------------------------------------------------------------------------------------------------------------------------------------------------------------------------------------------------------------------------------------------------------------------------------------------------------------------------------------------------------------------------------------------------------------------------------------------------------------------------------------------------------------------------------------------------------------------|--------------------|---------------------------------------------------------------------------------------------------------------------------------------------------------------------------------------|
| <b>Reduktion des Risikos von Lebererkrankungen</b> | <i>keine Evidenz</i>                                                                                                                                                                                                                                                                                                                                                                                                                                                                                                                                                                                                                                                                                                                                                                                                                                                                                                                                                                                                                                                                                                                                                                                                                                                                                                                                                                                                                                                                                                                                                                                                         | -                  | -                                                                                                                                                                                     |
| <b>Reduktion des Risikos von Krebserkrankungen</b> | <i>keine Evidenz</i>                                                                                                                                                                                                                                                                                                                                                                                                                                                                                                                                                                                                                                                                                                                                                                                                                                                                                                                                                                                                                                                                                                                                                                                                                                                                                                                                                                                                                                                                                                                                                                                                         | -                  | -                                                                                                                                                                                     |
| <b>Verringerung des Alkoholkonsums</b>             | <p>15 (R)CTs (n = 7662) an Erwachsenen ab 18 Jahren zeigen eine größere <b>Reduktion der Gesamtzahl alkoholischer Getränke pro Woche</b> in der Interventionsgruppe <b>um durchschnittlich 2,5 Getränke</b> im Vergleich zur Kontrollintervention (-2,51 (-3,81, -1.21), I<sup>2</sup> = 70 %) nach 6–36 Monaten Follow-up (20-34). Fünf von sechs weiteren (R)CTs (n = 2.746), die über diesen Endpunkt berichteten, aber nicht in die Meta-Analyse einbezogen werden konnten, zeigten keine statistisch signifikanten Unterschiede (35-40). Zwei Studien berichten Ergebnisse über 12 Monate Follow-up hinaus; eine Studie (n = 774) berichtet, dass der Nutzen der Intervention nach 24 Monaten zurückging (29), die andere Studie (n = 481) zeigte auch nach 48 Monaten eine größere Reduktion von 1,8 Getränken pro Woche in der Interventionsgruppe als in der Kontrollgruppe (25).</p> <p>Drei (R)CTs (n = 1.714) an älteren Erwachsenen ab 65 Jahren zeigten eine größere <b>Reduktion der Gesamtzahl alkoholischer Getränke pro Woche</b> in der Interventionsgruppe im Vergleich zur Kontrollgruppe nach 12 Monaten Follow-up (41-43). <b>Unterschiede in der Reduktion der Gesamtzahl alkoholischer Getränke pro Woche reichten von -2,2 (NR, p &lt; 0,01) (41) bis -5,3 (-8,5, -2,1) (42)</b>. In einer Studie (n = 158) blieb der Nutzen der Intervention bis 24 Monate Follow-up aufrecht (-3 [-6,1–0,1], p &lt; 0,001) (42).</p> <p>Die Interventionen reichten von einmaligen kurzen Beratungssitzungen oder einfachen Broschüren bis zu mehrmaligen Beratungssitzungen unterschiedlicher Länge (20-43).</p> | 18 (R)CTs          | <br>Moderat<br> |

**Wie groß sind erwünschte Effekte?**

- Vernachlässigbar
- Klein
- Moderat
- Groß
- Variiert
- Unklar

**Wie groß sind unerwünschte Effekte?**

- Vernachlässigbar
- Klein
- Moderat
- Groß
- Variiert
- Unklar



|                                                                                        |                                                                                                                                                                                                                                                                                                                                                                                                                                                                                                                                                                                                                                                                                                                                                                                                                                                                                                                                                                                                                                                                                                                                             |          |                          |
|----------------------------------------------------------------------------------------|---------------------------------------------------------------------------------------------------------------------------------------------------------------------------------------------------------------------------------------------------------------------------------------------------------------------------------------------------------------------------------------------------------------------------------------------------------------------------------------------------------------------------------------------------------------------------------------------------------------------------------------------------------------------------------------------------------------------------------------------------------------------------------------------------------------------------------------------------------------------------------------------------------------------------------------------------------------------------------------------------------------------------------------------------------------------------------------------------------------------------------------------|----------|--------------------------|
| <b>Erhöhung der Lebenserwartung</b>                                                    | <p>Fünf (R)CTs (n = 2678) mit Erwachsenen ab 18 Jahren berichten Ergebnisse zur Gesamtmortalität, aber <b>keinen statistisch signifikanten Unterschied</b> zwischen Interventions- und Kontrollgruppe nach 6 bis 48 Monaten Follow-up (21, 23, 25, 34, 44). Die Mortalitätsraten betragen zwischen 0 % und 1,8 %.</p> <p>Drei (R)CTs (n = 1899) an Erwachsenen ab 65 Jahren zeigten ebenfalls <b>keinen statistisch signifikanten Unterschied</b> hinsichtlich der Gesamtmortalität zwischen Interventions- und Kontrollgruppe nach 12 bis 24 Monaten Follow-up (41-43). Die Mortalitätsraten betragen zwischen 0,7 % und 5,6 %.</p> <p>Die Interventionen bestanden aus mehreren Beratungs- und Follow-up-Sitzungen, die entweder persönlich oder telefonisch (21, 23, 25, 34, 41-43) bzw. in einer kollaborativen Betreuung durch klinische Psycholog/inn/en, Sozialarbeiter/innen und Ärztinnen/Ärzte (44) durchgeführt wurden.</p>                                                                                                                                                                                                      | 8 (R)CTs | ◎◎○○<br>NIEDRIG<br><br>⇄ |
| <b>Reduktion des Risikos von Stoffwechselstörungen wie Diabetes</b>                    | <p style="text-align: center;"><i>keine Evidenz</i></p>                                                                                                                                                                                                                                                                                                                                                                                                                                                                                                                                                                                                                                                                                                                                                                                                                                                                                                                                                                                                                                                                                     | -        | -                        |
| <b>Verringerung psychischer Erkrankungen</b>                                           | <p>Fünf (R)CTs (n = 857) mit Erwachsenen ab 18 Jahren zeigten <b>keinen statistisch signifikanten Unterschied</b> in der durchschnittlichen Veränderung der Punktwerte von Skalen zur Erfassung von mentalen Gesundheitsproblemen zwischen Interventions- und Kontrollgruppe nach 6–36 Monaten Follow-up (20, 23, 35, 40, 44).</p> <p>Zwei (R)CTs (n = 1.519) an älteren Erwachsenen ab 65 Jahren fanden ebenfalls <b>keinen statistisch signifikanten Unterschied</b> in der durchschnittlichen Veränderung der Punktwerte von Skalen zur Erfassung von mentalen Gesundheitsproblemen (SF-12) (41, 45).</p> <p>Eine dieser Studien berichtet von einer Reduktion depressiver Symptome nach 12 Monaten Follow-up (durchschnittlicher Unterschied zugunsten der Interventionsgruppe 0,14 an einer 5-Punkte-Skala, p &lt; 0,05) (190).</p> <p>Die Interventionen bestanden aus mehreren Beratungs- und Follow-up-Sitzungen, die entweder persönlich oder telefonisch (20, 23, 35, 40, 41, 45) bzw. in einer kollaborativen Betreuung durch klinische Psycholog/inn/en, Sozialarbeiter/innen und Ärztinnen/Ärzte (44) durchgeführt wurden.</p> | 7 (R)CTs | ◎◎○○<br>NIEDRIG<br><br>⇄ |
| <b>Verbesserung des Wohlbefindens und der Zufriedenheit im Alltag (Lebensqualität)</b> | <p>Zwei RCTs (n = 852) mit Erwachsenen ab 18 Jahren zeigten <b>keinen statistisch signifikanten Unterschied</b> in der durchschnittlichen Veränderung der Punkteanzahl von Skalen zur Erfassung der Lebensqualität zwischen Interventions- und Kontrollgruppe (0,00 (-0,02–0,03); p = NR bzw. 1,0 (-1,6–3,6); p = 0,41) nach 6 Monaten Follow-up (36, 44).</p> <p>Die Intervention bestand aus einer 2- bis 3-minütigen ärztlichen Kurzberatung und einer Überweisung zu einem Alcohol Health Worker (36) bzw. aus einer kollaborativen Betreuung durch klinische Psycholog/inn/en, Sozialarbeiter/innen und Ärztinnen/Ärzte (44).</p>                                                                                                                                                                                                                                                                                                                                                                                                                                                                                                      | 2 RCTs   | ◎◎○○<br>NIEDRIG<br><br>⇄ |

|                                                                             |                                                                                                                                                                                                                                                                                                                                                                                                                                                                                                                                                                                                                                                                                  |        |                                                                                                                                                                                              |
|-----------------------------------------------------------------------------|----------------------------------------------------------------------------------------------------------------------------------------------------------------------------------------------------------------------------------------------------------------------------------------------------------------------------------------------------------------------------------------------------------------------------------------------------------------------------------------------------------------------------------------------------------------------------------------------------------------------------------------------------------------------------------|--------|----------------------------------------------------------------------------------------------------------------------------------------------------------------------------------------------|
| <b>Reduktion des Risikos von Verletzungen durch alkoholbedingte Unfälle</b> | Ein (R)CTs (n = 774) mit Erwachsenen ab 18 Jahren zeigt <b>keinen statistisch signifikanten Unterschied</b> in der Anzahl der Verkehrsunfälle mit tödlichen (IG: 0/392 vs. KG: 2/382) bzw. nicht-tödlichen Verletzungen (IG: 20/392 vs. KG: 31/382) (25). Ein weiterer (R)CT (n = 226) mit Erwachsenen ab 18 Jahren zeigte <b>keinen statistisch signifikanten Unterschied</b> in Bezug auf abnormale Unfallraten zwischen Interventions- und Kontrollgruppe (Frauen OR: 0,38 (0,02–9,72); Männer OR: 0,29 (0,06–1,49) (33). Die Intervention bestand aus zwei Beratungs- und zwei Follow-up-Anrufen oder -Emails (25) bzw. einer einmaligen 10-minütigen Beratungssitzung (33). | 2 RCTs | <br><b>NIEDRIG</b><br> |
|-----------------------------------------------------------------------------|----------------------------------------------------------------------------------------------------------------------------------------------------------------------------------------------------------------------------------------------------------------------------------------------------------------------------------------------------------------------------------------------------------------------------------------------------------------------------------------------------------------------------------------------------------------------------------------------------------------------------------------------------------------------------------|--------|----------------------------------------------------------------------------------------------------------------------------------------------------------------------------------------------|

### Nebenwirkungen der Beratung

Zwei RCTs (n = 930) berichteten von keinen Nebenwirkungen durch die Beratungsintervention (21, 45).

#### Legende:

 = negativer Effekt der Intervention; 
  = positiver Effekt der Intervention; 
  = ähnliche bzw. keine Effekte der Intervention/Kontrolle

(R)CT, (Randomized) controlled trial; NR, Nicht berichtet; IG, Interventionsgruppe; KG, Kontrollgruppe;

## BEURTEILUNG DER EVIDENZ

Wie beurteilen Sie insgesamt die Qualität der Evidenz?

- Sehr niedrig
- Niedrig
- Moderat
- Hoch
- Keine inkludierten Studien

Direkte Evidenz zu Nutzen und Schaden von Screening-Untersuchungen zu gesundheitsgefährdendem Alkoholkonsum ist derzeit nicht verfügbar. Die Evidenz zur Testgüte von Screening-Instrumenten zeigt, dass Kurzfragebögen (1-2 Items oder AUDIT-C) gesundheitsgefährdenden Alkoholkonsum mit einer ähnlichen Genauigkeit bestimmen können wie der längere AUDIT-Fragebogen. Zur Testgüte von Gamma-GT oder CDT im Kontext von Screening sind keine Studien verfügbar, allerdings deutet eine Studie in einem ambulanten Setting auf eine niedrige Sensitivität und hohe Spezifität hin. Es gibt moderate Evidenz, dass kurze, wiederholte Beratungsgespräche – zumindest kurzfristig – zu einem größeren Rückgang des Alkoholkonsums um 2,5 Getränke pro Woche im Vergleich zu einer Kontrollgruppe führen. Zum Nutzen und Schaden von Beratungsgesprächen in Bezug auf die Reduktion des Risikos von Leber-, Krebs- und Stoffwechselerkrankungen konnten keine Studien identifiziert werden. Für alle anderen Endpunkte (Erhöhung der Lebenserwartung, Verringerung psychischer Erkrankungen, Vorbeugung von Verletzungen durch alkoholbedingte Unfälle, Verbesserung des Wohlbefindens und der Zufriedenheit im Alltag (Lebensqualität)) konnten keine statistisch signifikanten Effekte gezeigt werden. Die Qualität der Evidenz dazu ist als niedrig einzustufen.

**Gibt es wichtige Unsicherheit darüber oder starke Unterschiede darin, wie Personen die wichtigsten Endpunkte bewerten?**

- Wichtige Unsicherheit/Variabilität
- Mögliche wichtige Unsicherheit/Variabilität
- Wahrscheinlich keine Unsicherheit/Variabilität
- Keine Unsicherheit/Variabilität

Die befragten Bürger/inn/en schwankten in der Einschätzung der Wichtigkeit:

**5–9 Punkte:** Erhöhung der Lebenserwartung

**4–9 Punkte:** Vorbeugung von Lebererkrankungen, Verringerung psychischer Erkrankungen, Vorbeugung von Stoffwechselstörungen wie Diabetes, Vorbeugung von Verletzungen durch alkoholbedingte Unfälle, Verringerung des Alkoholkonsums

**3–9 Punkte:** Verbesserung des Wohlbefindens und der Zufriedenheit im Alltag (Lebensqualität)

**2–9 Punkte:** Vorbeugung von Krebserkrankungen

**Spricht die Abwägung der erwünschten und unerwünschten Wirkungen für die Intervention?**

- Ja
- Wahrscheinlich ja
- Spricht weder für noch gegen die Intervention
- Wahrscheinlich nein
- Nein
- Variiert

**Diskussion im Panel:** Die Evidenzlage zu Screening auf Alkoholkonsum ist niedrig, da Screeningstudien fehlen und sich die Wirksamkeit von kurzen, wiederholten Beratungen auf den Surrogatparameter Alkoholkonsum beschränkt. Evidenz zu wichtigen Endpunkten wie Lebererkrankungen, Krebserkrankungen und Stoffwechselstörungen fehlt. Die erwünschten Effekte werden daher insgesamt als klein eingeschätzt. Was die unerwünschten Wirkungen betrifft, könnte ein Screening auf Alkoholkonsum eine Störung des Arzt-Patient-Verhältnisses bedeuten, da Proband/inn/en die Frage nach dem Alkoholkonsum oft als unangenehm empfinden. Insgesamt überwiegen aber die erwünschten die unerwünschten Effekte.

Unklar

**Ist die Intervention für Bürger/innen akzeptabel?**

- Nein
- Wahrscheinlich nein
- Wahrscheinlich ja
- Ja
- Variiert
- Unklar

**Ist die Intervention in Österreich umsetzbar?**

- Nein
- Wahrscheinlich nein
- Wahrscheinlich ja
- Ja
- Variiert
- Unklar

**Diskussion im Panel:** Hoher Alkoholkonsum ist gesellschaftlich akzeptiert und wird oft nicht als Problem wahrgenommen. Proband/inn/en empfinden die Frage nach dem Alkoholkonsum als unangenehm und als Eingriff in ihre Privatsphäre. Allerdings ist die gesundheitsschädigende Wirkung von hohem Alkoholkonsum eindeutig wissenschaftlich belegt und somit Verantwortung der Ärztin / des Arztes den Alkoholkonsum seiner Patient/inn/en im Auge zu behalten.

**Diskussion im Panel:** Die Intervention ist bereits Bestandteil der derzeitigen Vorsorgeuntersuchung und daher in Österreich umsetzbar.

## EMPFEHLUNG

Soll Screening auf und Beratung zu Alkoholkonsum bei Erwachsenen ab 18 Jahren durchgeführt werden? Falls ja, welcher Screening-Test sollte verwendet werden?

| Art der Empfehlung                                            | Starke Empfehlung dagegen                                                                                                                                                                                                                                                                                                                                                                                                                                                                                                                                                                                                                                                                                                                                                                                                                                        | Schwache Empfehlung dagegen | Schwache Empfehlung dafür | Starke Empfehlung dafür          |
|---------------------------------------------------------------|------------------------------------------------------------------------------------------------------------------------------------------------------------------------------------------------------------------------------------------------------------------------------------------------------------------------------------------------------------------------------------------------------------------------------------------------------------------------------------------------------------------------------------------------------------------------------------------------------------------------------------------------------------------------------------------------------------------------------------------------------------------------------------------------------------------------------------------------------------------|-----------------------------|---------------------------|----------------------------------|
|                                                               | <input type="radio"/>                                                                                                                                                                                                                                                                                                                                                                                                                                                                                                                                                                                                                                                                                                                                                                                                                                            | <input type="radio"/>       | <input type="radio"/>     | <input checked="" type="radio"/> |
| <b>Empfehlung</b><br>(ggf. für unterschiedliche Populationen) | <p>Alle Erwachsenen sollen bei jeder Vorsorgeuntersuchung mittels AUDIT-C auf gesundheitsgefährdenden Alkoholkonsum gescreent werden. Gegebenenfalls soll eine Beratung mittels der „5 E“ (Erfragen, Erfassen, Erwirken, Erreichen, Einrichten) erfolgen.</p> <p><i>Starke Empfehlung bei niedriger Qualität der Evidenz (starker Konsens)</i></p> <p>Ein Screening mittels Gamma-GT soll nicht durchgeführt werden.</p> <p><i>Starke Empfehlung bei sehr niedriger Qualität der Evidenz (starker Konsens)</i></p>                                                                                                                                                                                                                                                                                                                                               |                             |                           |                                  |
| <b>Begründung</b><br>(ggf. für unterschiedliche Populationen) | <p>Trotz niedriger Evidenzlage sollte die Vorsorgeuntersuchung genutzt werden, um teilnehmende Personen auf die Gefahren von gesundheitsgefährdendem Alkoholkonsum sowie dessen Grenzwerte hinzuweisen. Die Erhebung des Alkoholkonsums sollte anstatt des AUDIT-Fragebogens mittels AUDIT-C erfolgen, da dieser kürzer und weniger stigmatisierend ist und eine vergleichbare diagnostische Testgüte aufweist. Das Screening soll bei jeder Vorsorgeuntersuchung durchgeführt werden, da sich das Trinkverhalten – gerade bei jüngeren Personen – schnell ändern kann.</p> <p>Der Gamma-GT-Wert (Gamma-Glutamyltransferase-Wert) soll zukünftig nicht mehr bestimmt werden, da dieser aufgrund mehrerer biologischer Einflussgrößen eine sehr geringe Sensitivität aufweist. Ein erhöhter Wert kann bei teilnehmenden Personen oft Verunsicherung erzeugen.</p> |                             |                           |                                  |
| <b>Besondere Empfehlungen für Subgruppen</b>                  | Keine                                                                                                                                                                                                                                                                                                                                                                                                                                                                                                                                                                                                                                                                                                                                                                                                                                                            |                             |                           |                                  |
| <b>Überlegungen zur Umsetzung</b>                             | Keine                                                                                                                                                                                                                                                                                                                                                                                                                                                                                                                                                                                                                                                                                                                                                                                                                                                            |                             |                           |                                  |

## Referenzen

1. Strizek J, Uhl A. Bevölkerungserhebung zu Substanzgebrauch 2015 Band 1: Forschungsbericht. Wien: Bundesministerium für Gesundheit; 2016.
2. Tetrault JM, O'Connor P. Risky drinking and alcohol use disorder: Epidemiology, pathogenesis, clinical manifestations, course, assessment, and diagnosis 2017 [cited 2019 Jan 24]. Available from: <https://www.uptodate.com/contents/risky-drinking-and-alcohol-use-disorder-epidemiology-pathogenesis-clinical-manifestations-course-assessment-and-diagnosis>.
3. Klima G, Stürzenbecher S. Vorsorgeuntersuchung Neu. Wien: Hauptverband der österreichischen Sozialversicherungsträger; 2016.
4. O'Connor EA, Perdue LAS, C.A., Rushkin M, Patnode CD, Bean SI, Jonas DE. Screening and Behavioral Counseling Interventions to Reduce Unhealthy Alcohol Use in Adolescents and Adults: An Updated Systematic Review for the U.S. Preventive Services Task Force. Portland: Kaiser Permanente Center for Health Research 2018 01.06.2018. Contract No.: 18-05242-EF-1.
5. Aalto M, Alho H, Halme JT, Seppa K. AUDIT and its abbreviated versions in detecting heavy and binge drinking in a general population survey. *Drug Alcohol Depend.* 2009;103(1-2):25-9.
6. Dawson DA, Grant BF, Stinson FS, Zhou Y. Effectiveness of the Derived Alcohol Use Disorders Identification Test (AUDIT-C) in Screening for Alcohol Use Disorders and Risk Drinking in the US General Population. *Alcoholism: Clinical & Experimental Research.* 2005;29(5):844-54.
7. Levola J, Aalto M. Screening for At-Risk Drinking in a Population Reporting Symptoms of Depression: A Validation of the AUDIT, AUDIT-C, and AUDIT-3. *Alcohol Clin Exp Res.* 2015;39(7):1186-92.
8. McGinnis KA, Justice AC, Kraemer KL, Saitz R, Bryant KJ, Fiellin DA. Comparing alcohol screening measures among HIV-infected and -uninfected men. *Alcohol Clin Exp Res.* 2013;37(3):435-42.
9. McNeely J, Strauss SM, Saitz R, Cleland CM, Palamar JJ, Rotrosen J, et al. A Brief Patient Self-administered Substance Use Screening Tool for Primary Care: Two-site Validation Study of the Substance Use Brief Screen (SUBS). *Am J Med.* 2015;128(7):784 e9-19.
10. Seale JP, Boltri JM, Shellenberger S, Velasquez MM, Cornelius M, Guyinn M, et al. Primary Care Validation of a Single Screening Question for Drinkers. *Journal of Studies on Alcohol.* 2006;67(5):778-84.
11. Smith PC, Schmidt SM, Allensworth-Davies D, Saitz R. Primary care validation of a single-question alcohol screening test. *J Gen Intern Med.* 2009;24(7):783-8.
12. Gual A, Segura L, Contel M, Heather N, Colom J. Audit-3 and audit-4: effectiveness of two short forms of the alcohol use disorders identification test. *Alcohol and alcoholism.* 2002;37(6):591-6.
13. Rumpf H-J, Hapke U, Meyer C, John U. Screening for alcohol use disorders and at-risk drinking in the general population: psychometric performance of three questionnaires. *Alcohol and Alcoholism.* 2002;37(3):261-8.
14. Volk RJ, Steinbauer JR, Cantor SB, Holzer CE. The Alcohol Use Disorders Identification Test (AUDIT) as a screen for at-risk drinking in primary care patients of different racial/ethnic backgrounds. *Addiction.* 1997;92(2):197-206.
15. Degenhardt LJ, Conigrave KM, Wutzke SE, Saunders JB. The validity of an Australian modification of the AUDIT questionnaire. *Drug and Alcohol Review.* 2001;20(2):143-54.
16. Piccinelli M, Tessari E, Bortolomasi M, Piasere O, Semenzin M, Garzotto N, et al. Efficacy of the alcohol use disorders identification test as a screening tool for hazardous alcohol intake and related disorders in primary care: a validity study. *Bmj.* 1997;314(7078):420-.
17. Pittam GL, C. Screening for alcohol misuse in adults: External review against programme appraisal criteria for the UK National Screening Committee (UK NSC). Oxfordshire: Solutions for Public Health; 2016 01.09.2016.
18. Bertholet NW, M.R, Cheng DM, Samet JH, Saitz R. How Accurate Are Blood (or Breath) Tests for Identifying Self-Reported Heavy Drinking Among People with Alcohol Dependence? *Alcohol and Alcoholism.* 2014;49(4):423-9.

19. Chou R, Dana T, Bougatsos C, Grusing S, Blazina I. Screening for impaired visual acuity in older adults: A systematic review to update the 2009 US Preventive Services Task Force recommendation. 2016.
20. Aalto M, Saksanen R, Laine P, Forsstrom R, Raikaa M, Kiviluoto M, et al. Brief Intervention for Female Heavy Drinkers in Routine General Practice: A 3-Year Randomized, Controlled Study. *Alcoholism: Clinical and Experimental Research*. 2000;24(11):1680-6.
21. Bischof G, Grothues JM, Reinhardt S, Meyer C, John U, Rumpf HJ. Evaluation of a telephone-based stepped care intervention for alcohol-related disorders: a randomized controlled trial. *Drug Alcohol Depend*. 2008;93(3):244-51.
22. Cunningham JA, Neighbors C, Wild C, Humphreys K. Ultra-brief intervention for problem drinkers: results from a randomized controlled trial. *PLoS One*. 2012;7(10):e48003.
23. Drummond C, Coulton S, James D, Godfrey C, Parrott S, Baxter J, et al. Effectiveness and cost-effectiveness of a stepped care intervention for alcohol use disorders in primary care: pilot study. *Br J Psychiatry*. 2009;195(5):448-56.
24. Emmen MJ, Schippers GM, Wollersheim H, Bleijenberg G. Adding psychologist's intervention to physicians' advice to problem drinkers in the outpatient clinic. *Alcohol Alcohol*. 2005;40(3):219-26.
25. Fleming MF. Brief Physician Advice for Problem Alcohol Drinkers. *Jama*. 1997;277(13):1039.
26. Hansen AB, Becker U, Nielsen AS, Gronbaek M, Tolstrup JS, Thygesen LC. Internet-based brief personalized feedback intervention in a non-treatment-seeking population of adult heavy drinkers: a randomized controlled trial. *J Med Internet Res*. 2012;14(4):e98.
27. Heather N, Champion PD, Neville RG, Maccabe D. Evaluation of a controlled drinking minimal intervention for problem drinkers in general practice (the DRAMS scheme). *JR Coll Gen Pract*. 1987;37(301):358-63.
28. Maisto SA, Conigliaro J, McNeil M, Kraemer K, Conigliaro RL, Kelley ME. Effects of two types of brief intervention and readiness to change on alcohol use in hazardous drinkers. *Journal of Studies on Alcohol*. 2001;62(5):605-14.
29. Ockene JK, Adams A, Hurley TG, Wheeler EV, Hebert JR. Brief Physician- and Nurse Practitioner-Delivered Counseling for High-Risk Drinkers. *Archives of Internal Medicine*. 1999;159(18):2198.
30. Richmond R, Heather N, Wodak A, Kehoe L, Webster IAN. Controlled evaluation of a general practice-based brief intervention for excessive drinking. *Addiction*. 2006;90(1):119-32.
31. Rose GL, Badger GJ, Skelly JM, MacLean CD, Ferraro TA, Helzer JE. A Randomized Controlled Trial of Brief Intervention by Interactive Voice Response. *Alcohol Alcohol*. 2017;52(3):335-43.
32. Rubio G, Jimenez-Arriero MA, Martinez I, Ponce G, Palomo T. Efficacy of physician-delivered brief counseling intervention for binge drinkers. *Am J Med*. 2010;123(1):72-8.
33. Scott E, Anderson P. Randomized controlled trial of general practitioner intervention in women with excessive alcohol consumption. *Drug Alcohol Rev*. 1991;10(4):313-21.
34. Wallace P, Cutler S, Haines A. Randomised controlled trial of general practitioner intervention in patients with excessive alcohol consumption. *Bmj*. 1988;297(6649):663-8.
35. Burge SK, Amodei N, Elkin B, Catala S, Andrew SR, Lane PA, et al. An evaluation of two primary care Interventions for alcohol abuse among Mexican-American patients. *Addiction*. 1997;92(12):1705-16.
36. Crawford MJ, Sanatinia R, Barrett B, Byford S, Dean M, Green J, et al. The clinical effectiveness and cost-effectiveness of brief intervention for excessive alcohol consumption among people attending sexual health clinics: a randomised controlled trial (SHEAR). *Health Technol Assess*. 2014;18(30):1-48.
37. Curry SJ, Ludman EJ, Grothaus LC, Donovan D, Kim E. A randomized trial of a brief primary-care based intervention for reducing at-risk drinking practices. *Health Psychology*. 2003;22(2):156-65.

38. Schulz DN, Candel MJ, Kremers SP, Reinwand DA, Jander A, de Vries H. Effects of a Web-based tailored intervention to reduce alcohol consumption in adults: randomized controlled trial. *J Med Internet Res*. 2013;15(9):e206.
39. Senft RA, Polen MR, Freeborn DK, Hollis JF. Brief intervention in a primary care setting for hazardous drinkers. *American journal of preventive medicine*. 1997;13(6):464-70.
40. Upshur C, Weinreb L, Bharel M, Reed G, Frisard C. A randomized control trial of a chronic care intervention for homeless women with alcohol use problems. *J Subst Abuse Treat*. 2015;51:19-29.
41. Ettner SL, Xu H, Duru OK, Ang A, Tseng C-H, Tallen L, et al. The Effect of an Educational Intervention on Alcohol Consumption, At-Risk Drinking, and Health Care Utilization in Older Adults: The Project SHARE Study. *Journal of Studies on Alcohol and Drugs*. 2014;75(3):447-57.
42. Fleming MF, Manwell LB, Barry KL, Adams W, Stauffacher EA. Brief physician advice for alcohol problems in older adults: a randomized community-based trial. *Journal of Family Practice*. 1999;48:378-86.
43. Moore AA, Blow FC, Hoffing M, Welgreen S, Davis JW, Lin JC, et al. Primary care-based intervention to reduce at-risk drinking in older adults: a randomized controlled trial. *Addiction*. 2011;106(1):111-20.
44. Watkins KE, Ober AJ, Lamp K, Lind M, Setodji C, Osilla KC, et al. Collaborative Care for Opioid and Alcohol Use Disorders in Primary Care: The SUMMIT Randomized Clinical Trial. *JAMA Intern Med*. 2017;177(10):1480-8.
45. Watson JM, Crosby H, Dale VM, Tober G, Wu Q, Lang J, et al. AESOPS: a randomised controlled trial of the clinical effectiveness and cost-effectiveness of opportunistic screening and stepped care interventions for older hazardous alcohol users in primary care. *Health Technol Assess*. 2013;17(25):1-158.
